# Supplementary material
Source: PubMed Central journal article supplement (PMC2582541)

**Supplementary Materials for**

**IGF-1 Receptor Signaling is Required for Exercise-Induced Cardiac Hypertrophy**

Jaetaek Kim, Adam R. Wende, Sandra Sena, Heather A. Theobald, Jamie Soto, Crystal Sloan, Benjamin E. Wayment, Sheldon E. Litwin, Martin Holzenberger, Derek LeRoith, E. Dale Abel

**Supplementary TABLE S1.** Echocardiographic analysis of cardiac function in (A) sedentary and exercise-trained WT and CIGF1RKO mice and (B) sedentary and exercise-trained WT and CIRKO mice. Values are mean  $\pm$  SEM. \* $P < 0.05$  versus WT sedentary. LVEDD indicates left ventricular end diastolic diameter; LVESD, left ventricular end systolic diameter; IVSd, interventricular septum thickness measured in diastole; IVSs, interventricular septum thickness measured in systole; PWd, left ventricular posterior wall thickness measured in diastole; PWS, left ventricular posterior wall thickness measured in systole; FS, fractional shortening; EF, ejection fraction.

**Supplementary Figure S1.** Serum IGF-1 concentrations obtained from sedentary (Sed) and trained (Sw) WT and CIGF1RKO mice. N = 4 (WT Sed); 3 (WT Sw); 6 (CIGF1RKO Sed); 5 (CIGF1RKO Sw). NS - not significant.

**Supplementary Figure S2.** Insulin receptor (IR) expression in hearts of sedentary (Sed) and trained (Sw) WT and CIGF1RKO mice. Upper panel is a representative blot and the lower panel is the densitometry of the depicted blot. NS - not significant.

**Supplementary Figure S3.** (A) Western blot analysis of sedentary and swim trained CIRKO mice showing total and phosphorylated AMPK. Upper panel is a representative blot and lower panel is densitometry of results from 3-4 hearts per group expressed as fold-change relative to sedentary WT. (B) Total and phosphorylated eEF2. Upper panel shows a representative blot and the lower panel is densitometry of results from 5-7 hearts per group. NS - not significant.

**Supplementary Figure S4.** Western blot analysis of sedentary and swim trained CIGF1RKO mice showing total and phosphorylated MEK (A) and ERK1/2 (B) in upper panels and densitometry in the lower panels. \*  $P < 0.05$ , \*\*  $P < 0.01$ .

**Supplementary Figure S5.** Western blot analysis of sedentary and swim trained CIRKO mice showing total and phosphorylated MEK (A) and ERK1/2 (B) in upper panels and densitometry in the lower panels. NS - not significant.

# Supplementary Table S1. Echocardiographic analysis of cardiac function

**A**

---

|            | <b>WT Sed</b><br><b>(n = 3)</b> | <b>WT Sw</b><br><b>(n = 7)</b> | <b>CIGF1RKO Sed</b><br><b>(n = 6)</b> | <b>CIGF1RKOSw</b><br><b>(n = 9)</b> |
|------------|---------------------------------|--------------------------------|---------------------------------------|-------------------------------------|
| LVEDD (mm) | 3.67 ± 0.03                     | 4.01 ± 0.1                     | 3.98 ± 0.09                           | 4.06 ± 0.06                         |
| LVESD (mm) | 2.37 ± 0.15                     | 2.71 ± 0.33                    | 2.82 ± 0.12                           | 2.87 ± 0.07                         |
| IVSd (mm)  | 0.80 ± 0.01                     | 0.77 ± 0.03                    | 0.85 ± 0.04                           | 0.74 ± 0.03                         |
| IVSs (mm)  | 1.30 ± 0.01                     | 1.21 ± 0.11                    | 1.25 ± 0.14                           | 1.19 ± 0.08                         |
| PWd (mm)   | 0.67 ± 0.03                     | 0.74 ± 0.03                    | 0.70 ± 0.04                           | 0.64 ± 0.02                         |
| PWs (mm)   | 1.00 ± 0.06                     | 1.03 ± 0.05                    | 1.03 ± 0.04                           | 0.92 ± 0.02                         |
| FS (%)     | 35.4 ± 2.0                      | 31.9 ± 1.5                     | 30.1 ± 2.3                            | 29.1 ± 1.0                          |
| EF (%)     | 73.0 ± 2.5                      | 68.1 ± 2.1                     | 63.5 ± 4.0                            | 64.2 ± 1.6                          |

---

**B**

---

|            | <b>WT Sed</b><br><b>(n = 6)</b> | <b>WT Sw</b><br><b>(n = 5)</b> | <b>CIRKO Sed</b><br><b>(n = 6)</b> | <b>CIRKOSw</b><br><b>(n = 9)</b> |
|------------|---------------------------------|--------------------------------|------------------------------------|----------------------------------|
| LVEDD (mm) | 4.07 ± 0.11                     | 4.34 ± 0.11                    | 4.00 ± 0.06                        | 4.31 ± 0.30                      |
| LVESD (mm) | 2.90 ± 0.17                     | 3.06 ± 0.24                    | 2.92 ± 0.08                        | 3.14 ± 0.08                      |
| IVSd (mm)  | 0.78 ± 0.05                     | 0.72 ± 0.05                    | 0.63 ± 0.02 *                      | 0.66 ± 0.02                      |
| IVSs (mm)  | 1.25 ± 0.06                     | 1.26 ± 0.11                    | 1.05 ± 0.03                        | 1.09 ± 0.04                      |
| PWd (mm)   | 0.63 ± 0.02                     | 0.62 ± 0.04                    | 0.65 ± 0.04                        | 0.60 ± 0.03                      |
| PWs (mm)   | 0.90 ± 0.03                     | 0.94 ± 0.05                    | 0.92 ± 0.05                        | 0.86 ± 0.03                      |
| FS (%)     | 29.1 ± 2.5                      | 30.1 ± 3.6                     | 27.1 ± 1.3                         | 27.1 ± 1.0                       |
| EF (%)     | 63.3 ± 3.4                      | 64.6 ± 5.2                     | 61.2 ± 1.9                         | 61.0 ± 1.6                       |

---

# Supplementary Figure S1

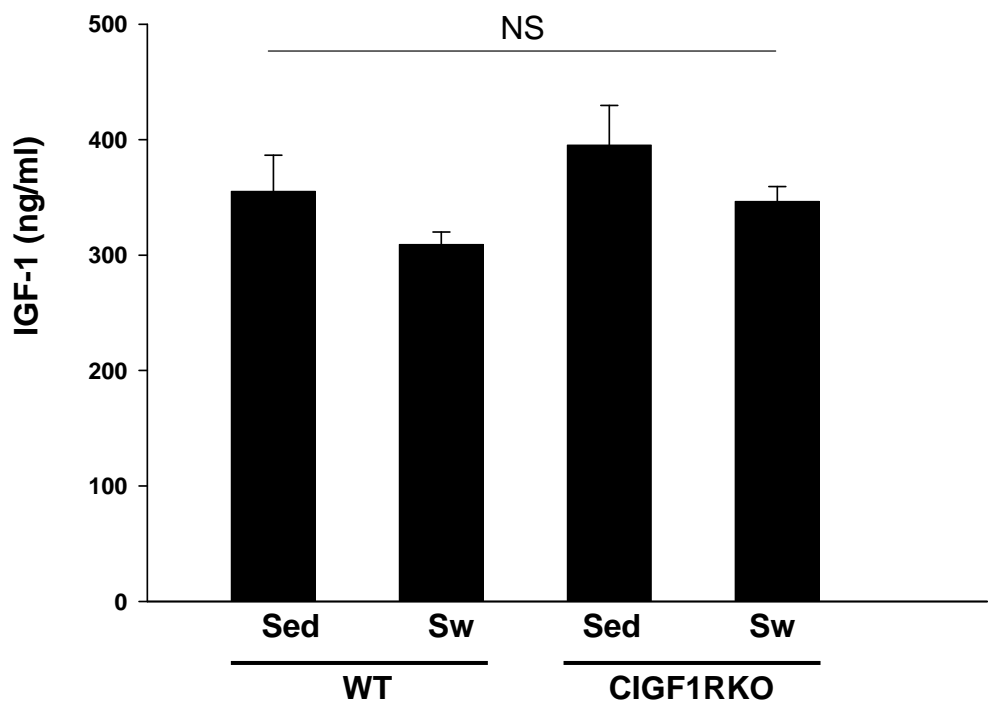

# Supplementary Figure S2

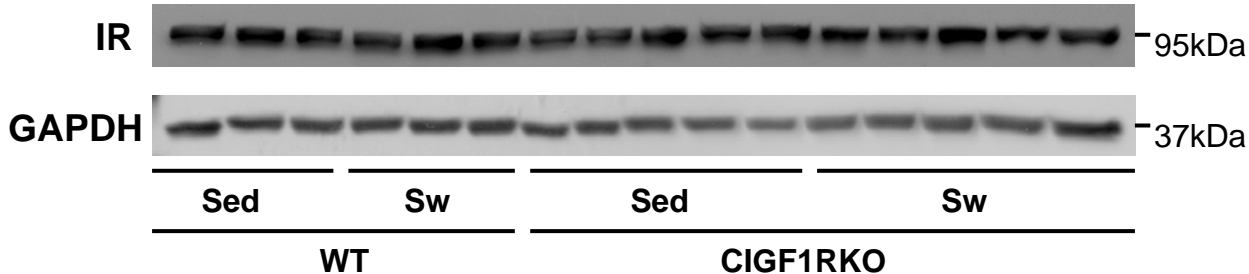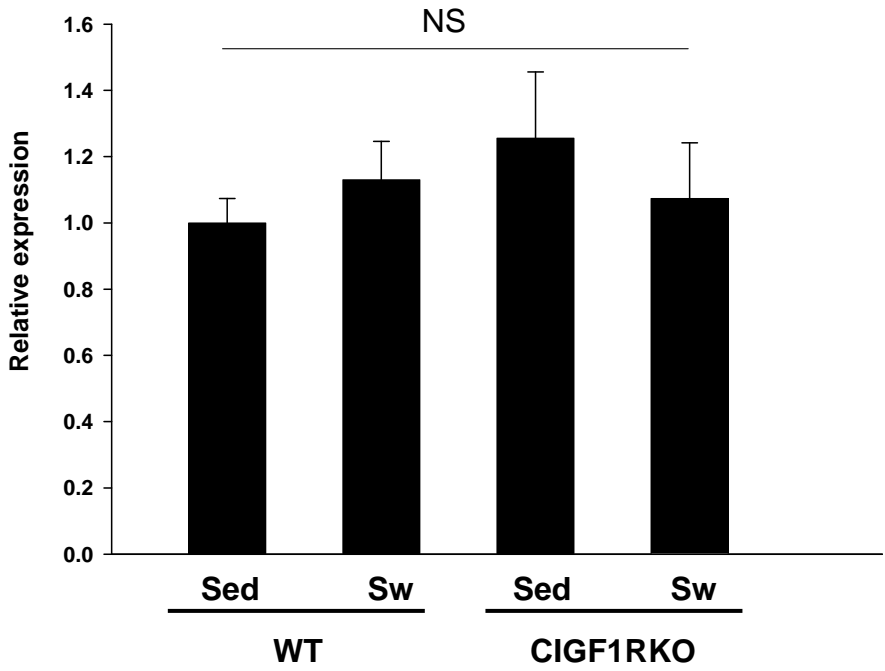

# Supplementary Figure S3

**A**

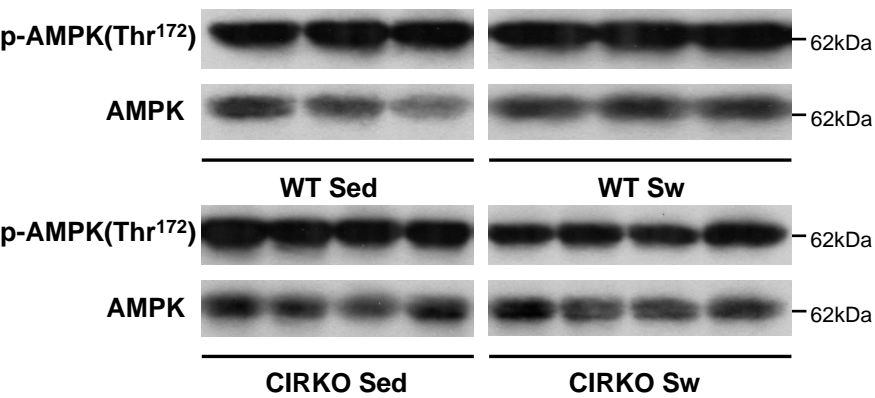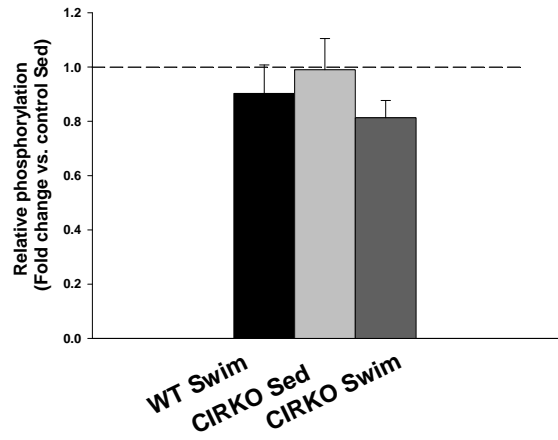

**B**

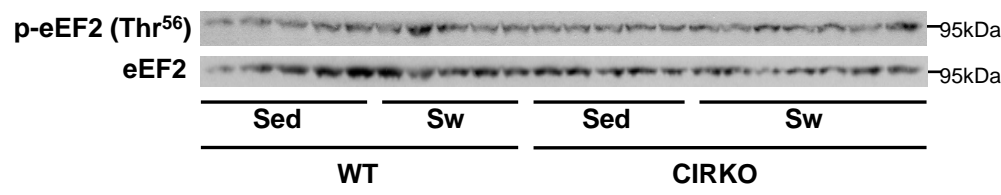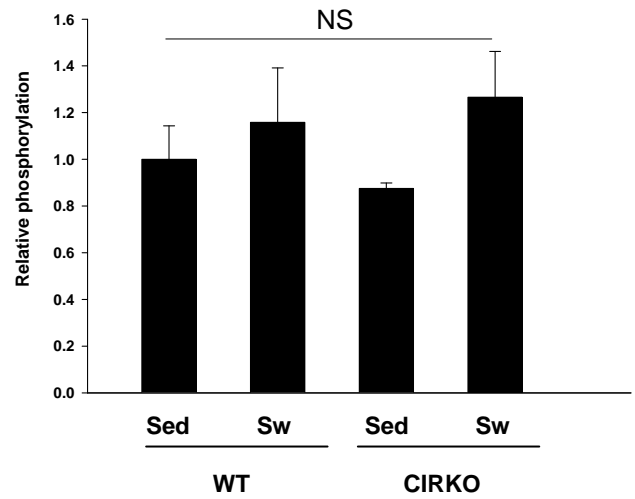

# Supplementary Figure S4

## A

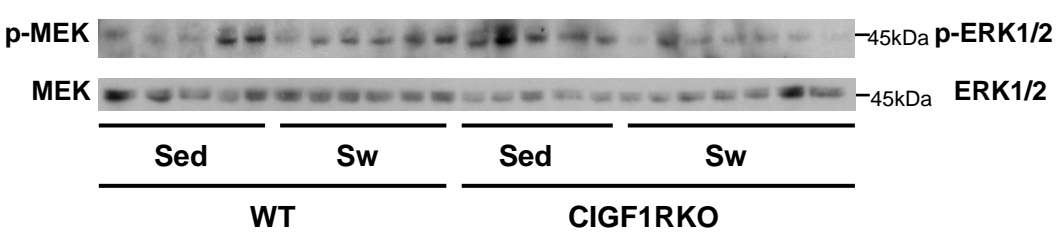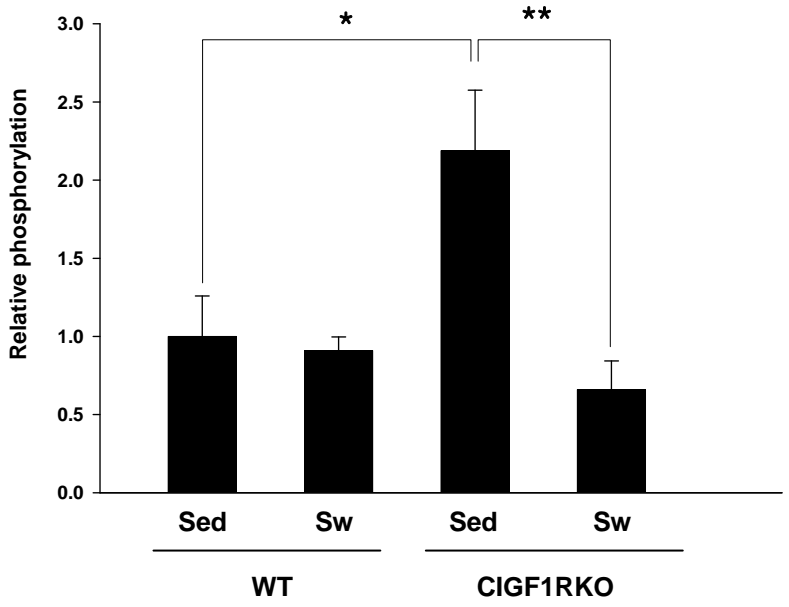

## B

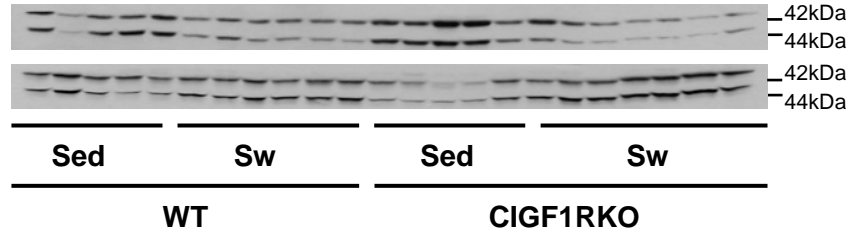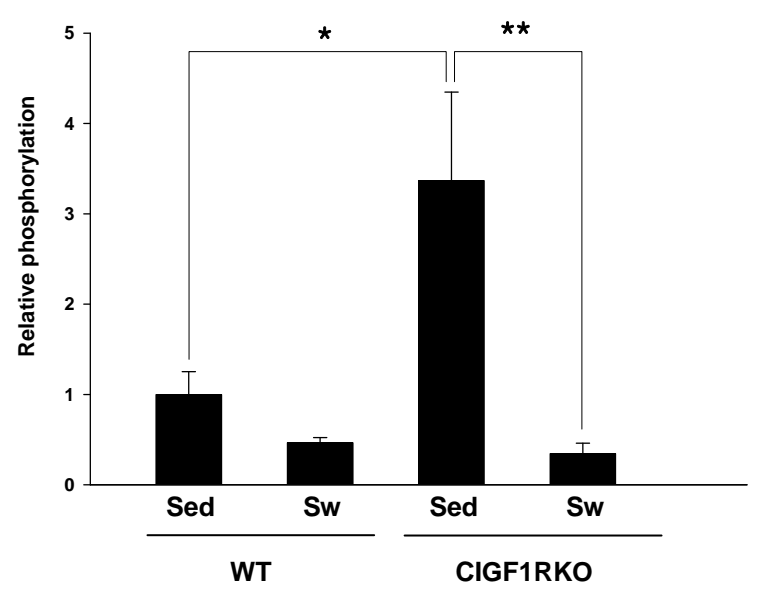

# Supplementary Figure S5

**A**

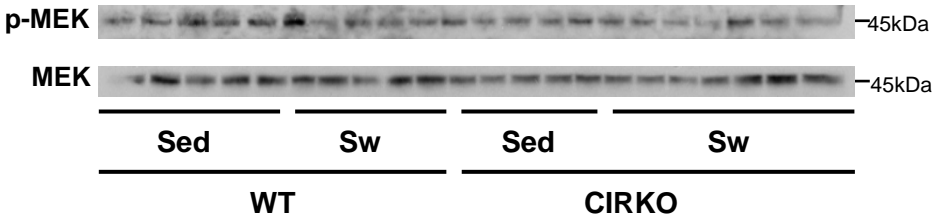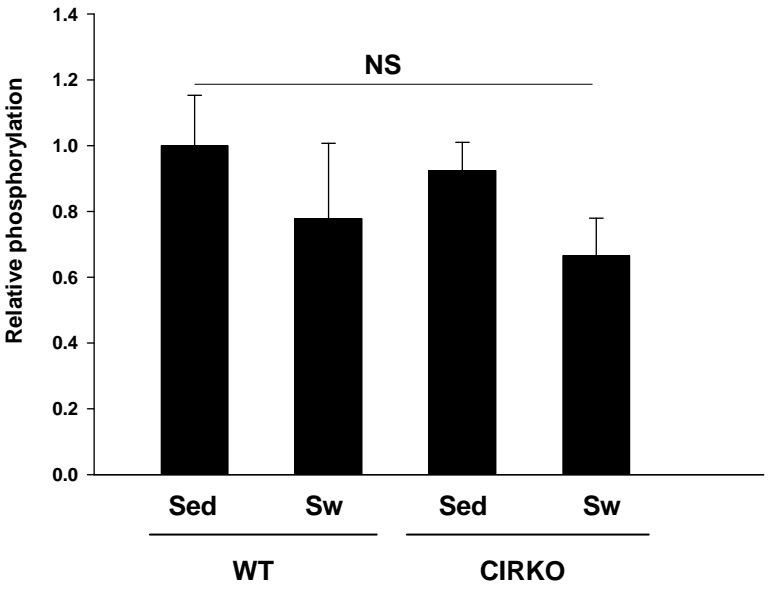

**B**

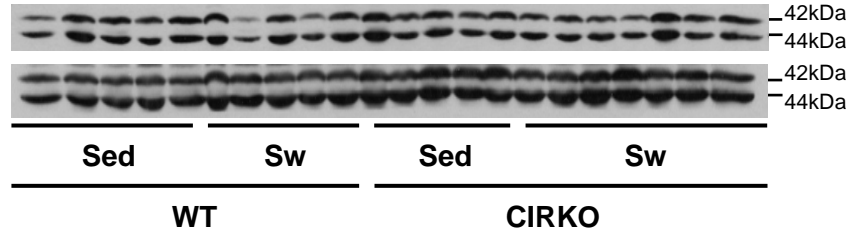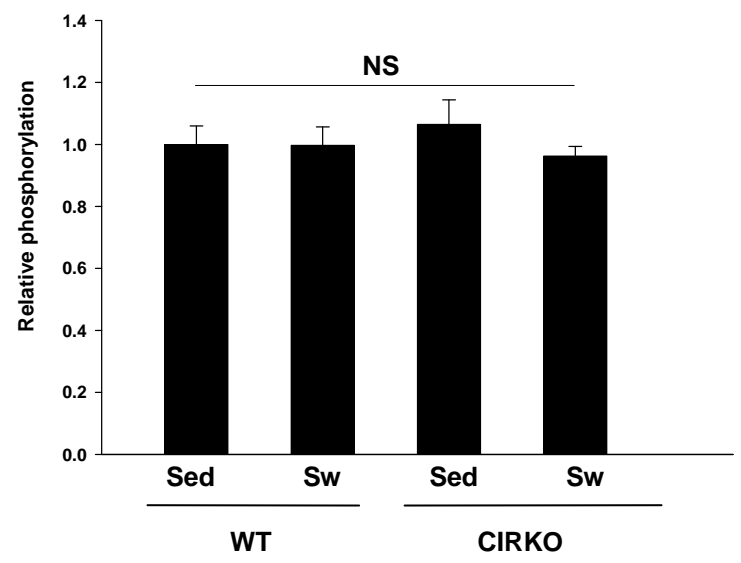

Supplement: me.2008-0265_1.pdf [file me.2008-0265_1.pdf]
